# Supplementary material for: Effects of denitrification on the distributions of trace gas abundances in the polar regions: a comparison of WACCM with observations
Source: Copernicus journal article supplement (doi:10.5194/acp-23-6849-2023), 2023-06-21
Supplement: Supplementary file 1 [file acp-23-6849-2023-supplement.pdf]

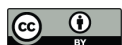

*Supplement of*

## **Effects of denitrification on the distributions of trace gas abundances in the polar regions: a comparison of WACCM with observations**

**Michael Weimer et al.**

*Correspondence to:* Michael Weimer (mweimer@mit.edu)

The copyright of individual parts of the supplement might differ from the article licence.

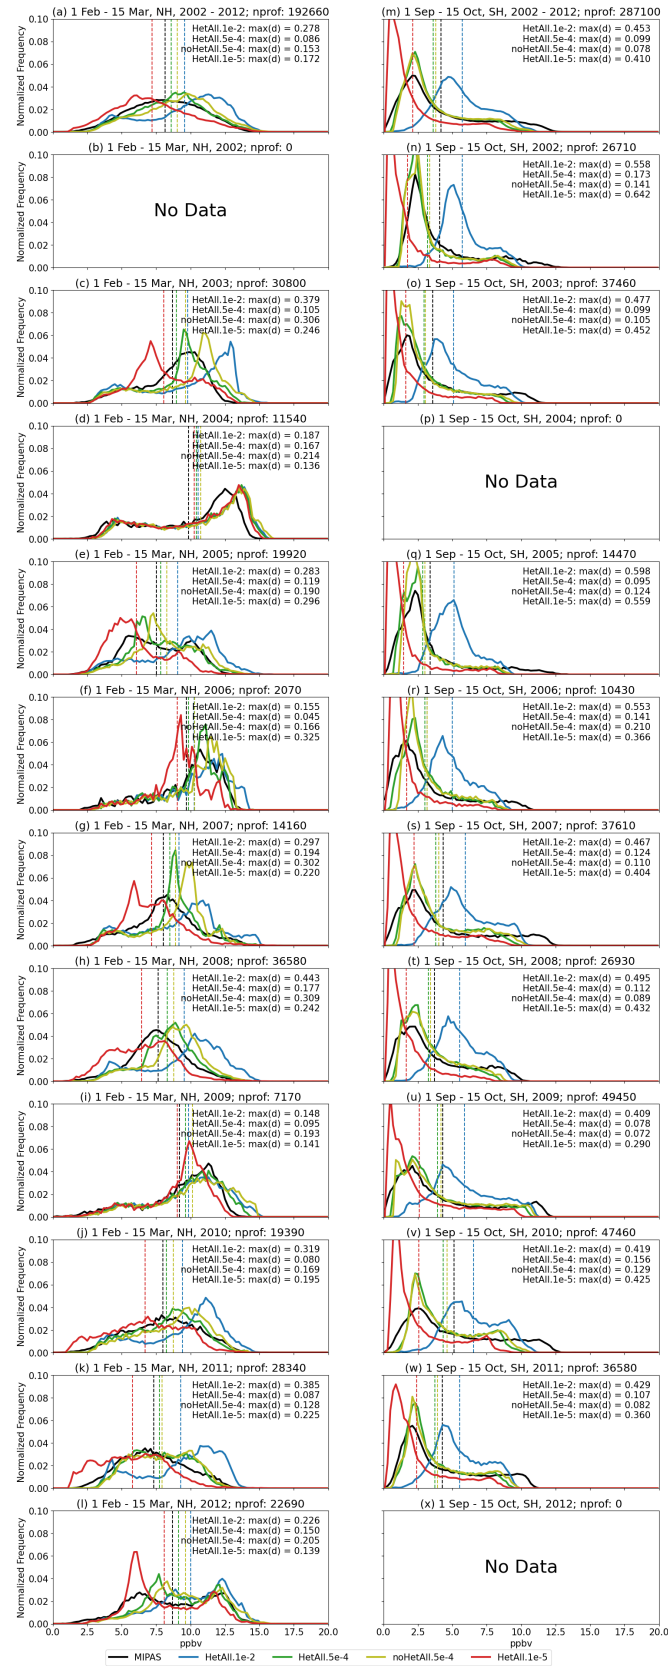

Figure S1. Same as Fig. 3 (HNO<sub>3</sub>) of the main manuscript, but showing all individual years.

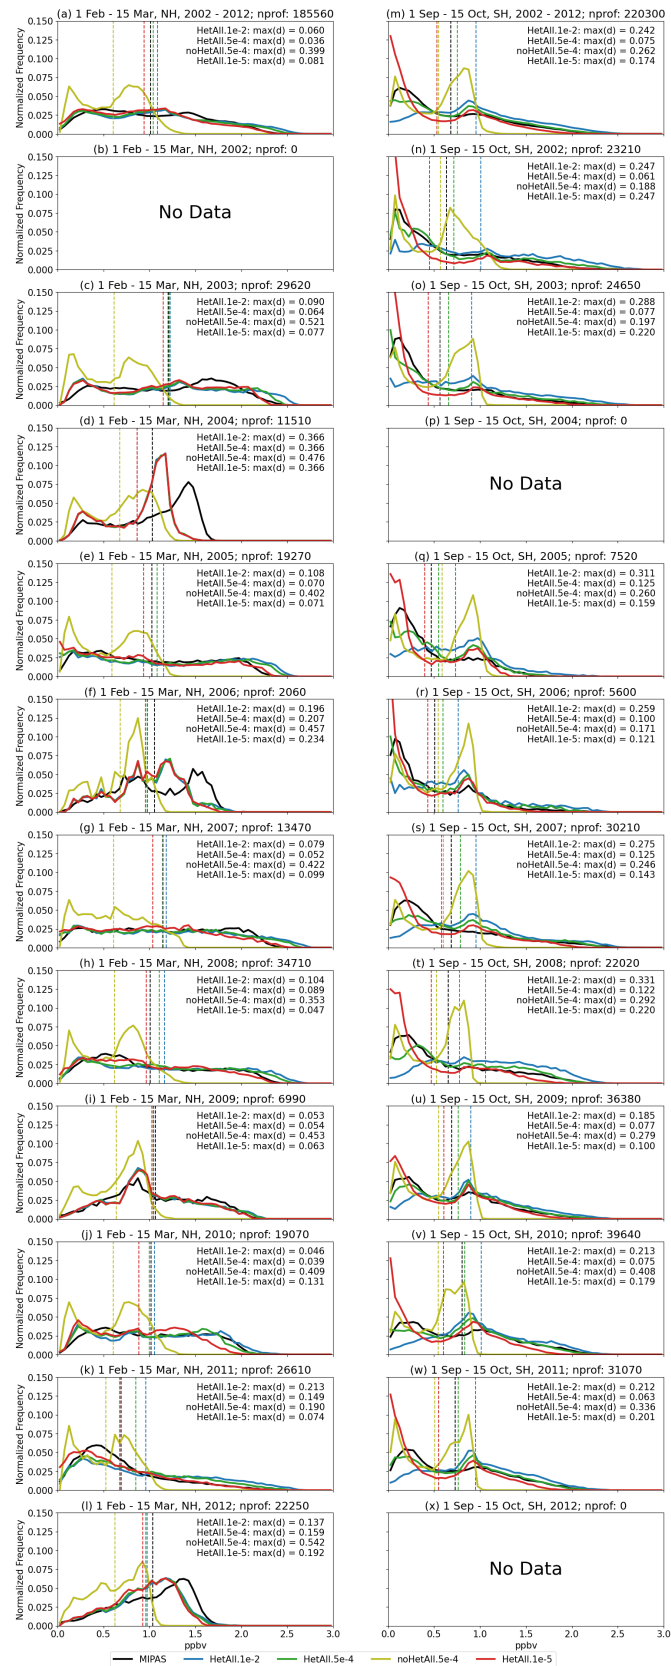

Figure S2. Same as Fig. 5 (ClONO<sub>2</sub>) of the main manuscript, but showing all individual years.

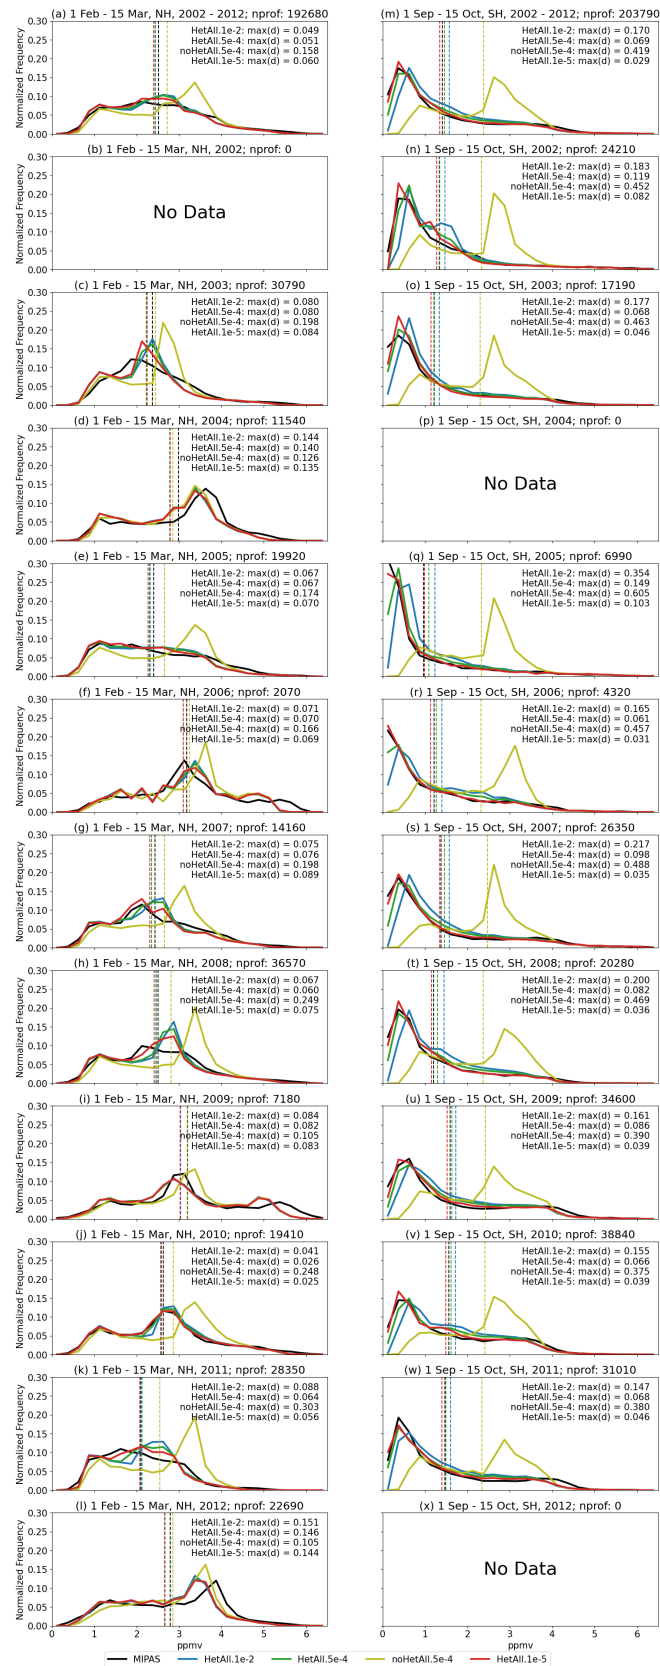

Figure S3. Same as Fig. 6 ( $O_3$ ) of the main manuscript, but showing all individual years.

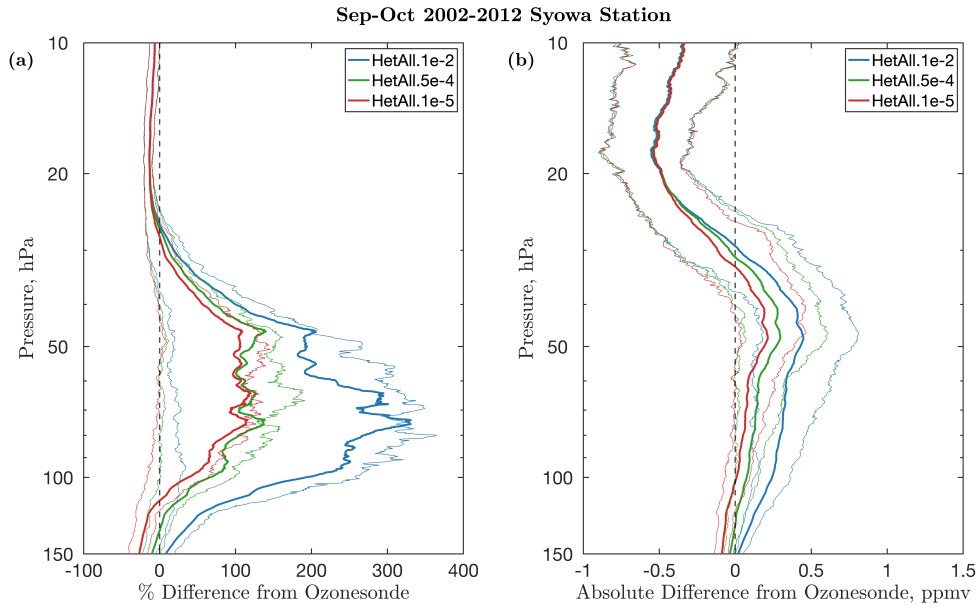

**Figure S4.** Same as Fig. 7 b and c for ozone of the main manuscript, but showing Syowa Station without the noHetAll simulation.

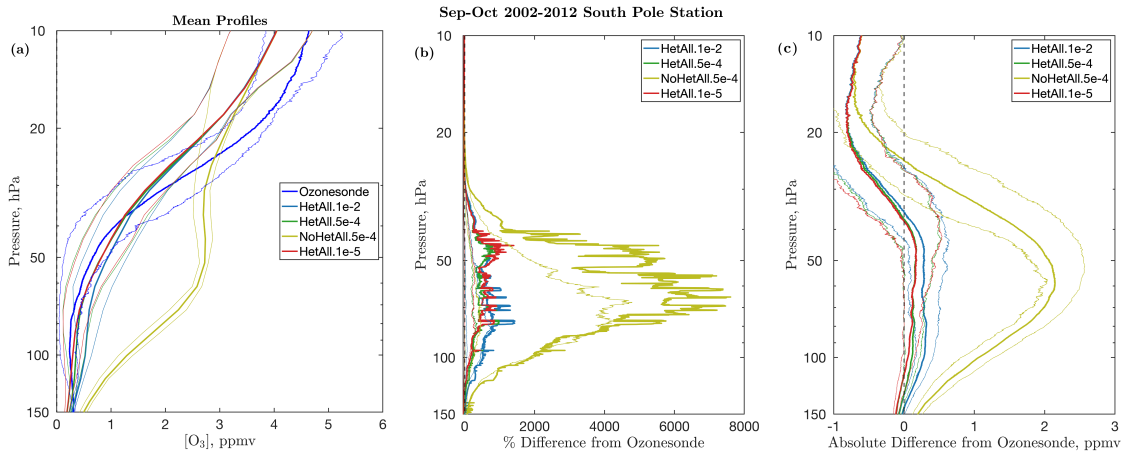

**Figure S5.** Same as Fig. 7 a to c for ozone of the main manuscript, but showing South Pole Station.
